# Supplementary material for: First Stage of the Development of an Eco-Friendly Detergent Formulation for Efficient Removal of Carbonized Soil
Source: MDPI journal article supplement (doi:10.3390/molecules27217460), 2022-11-02
Supplement: s1 [file s1]

# Supplementary Materials

## First Stage of the Development of an Eco-Friendly Detergent Formulation for Efficient Removal of Carbonized Soil

Andreia P. M. Fernandes<sup>1</sup>, Ana M. Ferreira<sup>2</sup>, Marco Sebastião<sup>1</sup>, Ricardo Santos<sup>1</sup>,  
Catarina M. S. S. Neves<sup>2\*</sup> and João A.P. Coutinho<sup>2</sup>

<sup>1</sup>*Mistolin S.A., Zona Industrial de Vagos Lt 58, 3840-385 Vagos, Portugal.*

<sup>2</sup>*CICECO – Aveiro Institute of Materials, Department of Chemistry, University of Aveiro,  
3810-193, Aveiro, Portugal.*

\*Corresponding author: catarinasn@ua.pt

### Contents

**Number of pages:** 14

**Number of figures:** 6

**Number of tables:** 11

In this work, the commercial degreaser KH7, from KH Lloreda company, was used. This degreaser is composed of water, fatty ethoxylated alcohol, methoxypropanol, monoethanolamine and polycarboxylate with a pH of 11.25.

## Tables

**Table S1.** pH of the different formulations used in the screening.

| Solvent →<br>Surfactant ↓                              | pH    |      |      |      |       |
|--------------------------------------------------------|-------|------|------|------|-------|
|                                                        | PM    | DPM  | BDG  | MMB  | IPG   |
| [N <sub>1118</sub> ][C <sub>8</sub> O <sub>2</sub> ]   | 10.36 | 7.91 | 8.53 | 8.54 | 10.26 |
| [N <sub>1118</sub> ][C <sub>10</sub> O <sub>2</sub> ]  | 8.87  | 8.20 | 8.28 | 8.28 | 8.75  |
| [N <sub>1118</sub> ][C <sub>12</sub> O <sub>2</sub> ]  | 9.02  | 8.48 | 9.06 | 8.84 | 8.97  |
| [N <sub>11110</sub> ][C <sub>8</sub> O <sub>2</sub> ]  | 10.19 | 8.32 | 9.82 | 7.86 | 10.38 |
| [N <sub>11110</sub> ][C <sub>10</sub> O <sub>2</sub> ] | 9.21  | 8.45 | 8.83 | 8.83 | 9.06  |
| [N <sub>11110</sub> ][C <sub>12</sub> O <sub>2</sub> ] | 9.30  | 8.56 | 8.33 | 8.10 | 9.34  |
| [N <sub>11112</sub> ][C <sub>10</sub> O <sub>2</sub> ] | 9.35  | 8.39 | 8.75 | 9.15 | 9.25  |
| [N <sub>11112</sub> ][C <sub>12</sub> O <sub>2</sub> ] | 9.65  | 8.62 | 9.00 | 9.30 | 9.46  |
| C <sub>12</sub> -C <sub>15</sub> 7EO's                 | 5.08  | 4.15 | 4.99 | 4.05 | 5.11  |
| C <sub>10</sub> 6EO's                                  | 4.68  | 4.04 | 4.67 | 3.18 | 4.54  |
| C <sub>12</sub> -C <sub>15</sub> 9EO's                 | 5.80  | 4.30 | 5.94 | 4.19 | 5.43  |
| C <sub>11</sub> -C <sub>13</sub> 9EO's                 | 5.07  | 3.95 | 4.99 | 3.90 | 4.71  |
| C <sub>10</sub> -C <sub>14</sub> 8EO's                 | 5.10  | 4.05 | 4.86 | 3.98 | 5.04  |

**Table S2.** *HLB* values of nonionic surfactants, given by the suppliers.

| <b>Nonionic surfactant</b>             | <b><i>HLB</i></b> |
|----------------------------------------|-------------------|
| C <sub>10</sub> 6EO's                  | 12.4              |
| C <sub>11</sub> -C <sub>13</sub> 9EO's | 13.2              |
| C <sub>12</sub> -C <sub>15</sub> 7EO's | 12.3              |
| C <sub>12</sub> -C <sub>15</sub> 9EO's | 13.1              |
| C <sub>10</sub> -C <sub>14</sub> 8EO's | 13.6              |

**Table S3.** Mixture design for optimization of the solvent composition.

| <b>Run</b> | <b>Coded variables</b>  |                      |                    |
|------------|-------------------------|----------------------|--------------------|
|            | <b>Surfactant (wt%)</b> | <b>Solvent (wt%)</b> | <b>Water (wt%)</b> |
| 1          | 10.00                   | 13.00                | 77.00              |
| 2          | 10.00                   | 3.00                 | 87.00              |
| 3          | 3.00                    | 13.00                | 84.00              |
| 4          | 3.00                    | 3.00                 | 94.00              |
| 5          | 3.00                    | 8.00                 | 89.00              |
| 6          | 10.00                   | 8.00                 | 82.00              |
| 7          | 6.50                    | 3.00                 | 90.50              |
| 8          | 6.50                    | 13.00                | 80.50              |
| 9          | 6.50                    | 8.00                 | 85.50              |

**Table S4.** pH and efficiency obtained for the formulations used in the mixture design of C<sub>11</sub>-C<sub>13</sub> 9EO's, IPG and water.

Model for ceramic:  $R^2 = 0.97$  and  $R^2_{adj.} = 0.91$

Model for stainless-steel:  $R^2 = 0.80$  and  $R^2_{adj.} = 0.47$

| Run | pH   | Experimental Efficiency |                 | Predicted Efficiency |                 |
|-----|------|-------------------------|-----------------|----------------------|-----------------|
|     |      | Ceramic                 | Stainless-steel | Ceramic              | Stainless-steel |
| 1   | 4.24 | 0.45                    | 0.65            | 0.42                 | 0.61            |
| 2   | 4.09 | 0.76                    | 0.87            | 0.79                 | 0.80            |
| 3   | 4.24 | 1.02                    | 0.87            | 0.99                 | 0.93            |
| 4   | 4.18 | 0.60                    | 0.90            | 0.62                 | 0.92            |
| 5   | 4.19 | 0.90                    | 0.90            | 0.90                 | 0.83            |
| 6   | 4.15 | 0.70                    | 0.51            | 0.70                 | 0.61            |
| 7   | 4.30 | 0.93                    | 0.82            | 0.87                 | 0.86            |
| 8   | 4.20 | 0.82                    | 0.80            | 0.87                 | 0.78            |
| 9   | 4.14 | 0.96                    | 0.74            | 0.97                 | 0.72            |

**Table S5.** pH and efficiency obtained for the formulations used in the mixture design of [N<sub>1118</sub>][C<sub>8</sub>O<sub>2</sub>], BDG and water.

Model for ceramic:  $R^2 = 0.94$  and  $R^2_{adj} = 0.84$

Model for stainless-steel:  $R^2 = 0.92$  and  $R^2_{adj} = 0.80$

| Run | pH   | Experimental Efficiency |                 | Predicted Efficiency |                 |
|-----|------|-------------------------|-----------------|----------------------|-----------------|
|     |      | Ceramic                 | Stainless-steel | Ceramic              | Stainless-steel |
| 1   | 8.23 | 0.87                    | 1.10            | 0.83                 | 1.06            |
| 2   | 8.74 | 0.63                    | 0.95            | 0.65                 | 0.93            |
| 3   | 7.58 | 0.47                    | 1.03            | 0.41                 | 0.99            |
| 4   | 7.92 | 0.32                    | 0.41            | 0.31                 | 0.40            |
| 5   | 7.70 | 0.25                    | 0.65            | 0.33                 | 0.70            |
| 6   | 8.41 | 0.68                    | 0.93            | 0.70                 | 0.99            |
| 7   | 7.83 | 0.87                    | 0.68            | 0.87                 | 0.71            |
| 8   | 8.05 | 0.90                    | 0.98            | 1.00                 | 1.06            |
| 9   | 8.15 | 1.00                    | 1.00            | 0.90                 | 0.89            |

**Table S6.** ANOVA for the mixture design using formulations composed of C<sub>11</sub>-C<sub>13</sub> 9EOs, IPG and water applied to the ceramic surface.

|                               | <b>SS</b> | <b>df</b> | <b>MS</b> | <b>F</b> | <b>P</b> |
|-------------------------------|-----------|-----------|-----------|----------|----------|
| <b>Model (Regression)</b>     | 0.265929  | 5         | 0.053186  | 17.30503 | 0.020203 |
| <b>Total Error (Residual)</b> | 0.009220  | 3         | 0.003073  |          |          |
| <b>Total Adjusted</b>         | 0.275149  | 8         | 0.034394  |          |          |

**Table S7.** ANOVA for the mixture design using formulations composed of C<sub>11</sub>-C<sub>13</sub> 9EOs, IPG and water applied to the stainless-steel surface.

|                               | <b>SS</b> | <b>df</b> | <b>MS</b> | <b>F</b> | <b>P</b> |
|-------------------------------|-----------|-----------|-----------|----------|----------|
| <b>Model (Regression)</b>     | 0.110659  | 5         | 0.022132  | 3.399777 | 0.051053 |
| <b>Total Error (Residual)</b> | 0.027667  | 3         | 0.009222  |          |          |
| <b>Total Adjusted</b>         | 0.138327  | 8         | 0.017291  |          |          |

**Table S8.** Efficiency and pH obtained for the optimal composition of the formulation composed of C<sub>11</sub>-C<sub>13</sub> 9EO's, IPG and water.

| Surface         | Optimal composition |                                        |                  | Efficiency   |           | Relative deviation (%) | pH   |
|-----------------|---------------------|----------------------------------------|------------------|--------------|-----------|------------------------|------|
|                 | IPG                 | C <sub>11</sub> -C <sub>13</sub> 9EO's | H <sub>2</sub> O | Experimental | Predicted |                        |      |
| Ceramic         | 10.0                | 5.0                                    | 85.0             | 1.03         | 1.00      | 3.00                   | 4.30 |
| Stainless-steel | 13.0                | 3.0                                    | 84.0             | 0.95         | 0.91      | 4.40                   | 4.24 |

**Table S9.** ANOVA for the mixture design using formulations composed of [N<sub>1118</sub>][C<sub>8</sub>O<sub>2</sub>], BDG and water applied to the ceramic surface.

|                               | SS         | df | MS       | F        | p       |
|-------------------------------|------------|----|----------|----------|---------|
| <b>Model (Regression)</b>     | 0.54402678 | 5  | 0.108805 | 9.313672 | 0.04783 |
| <b>Total Error (Residual)</b> | 0.03504698 | 3  | 0.011682 |          |         |
| <b>Total Adjusted</b>         | 0.57907375 | 8  | 0.072384 |          |         |

**Table S10.** ANOVA for the mixture design using formulations composed of [N<sub>1118</sub>][C<sub>8</sub>O<sub>2</sub>], BDG and water applied to the stainless-steel surface.

|                               | SS       | df | MS       | F        | p        |
|-------------------------------|----------|----|----------|----------|----------|
| <b>Model (Regression)</b>     | 0.381089 | 5  | 0.076218 | 7.227412 | 0.047155 |
| <b>Total Error (Residual)</b> | 0.031637 | 3  | 0.010546 |          |          |
| <b>Total Adjusted</b>         | 0.412726 | 8  | 0.051591 |          |          |

**Table S11.** Efficiency and pH obtained for the optimal composition of the formulation composed of [N<sub>1118</sub>][C<sub>8</sub>O<sub>2</sub>], BDG and water.

| Surface         | Optimal composition |                                                      |                  | Efficiency   |           | Relative deviation (%) | pH   |
|-----------------|---------------------|------------------------------------------------------|------------------|--------------|-----------|------------------------|------|
|                 | BDG                 | [N <sub>1118</sub> ][C <sub>8</sub> O <sub>2</sub> ] | H <sub>2</sub> O | Experimental | Predicted |                        |      |
| Ceramic         | 13.0                | 7.0                                                  | 80.0             | 0.99         | 1.03      | 3.90                   | 8.28 |
| Stainless-steel | 13.0                | 8.0                                                  | 79.0             | 1.04         | 1.07      | 2.80                   | 8.63 |



## Figures

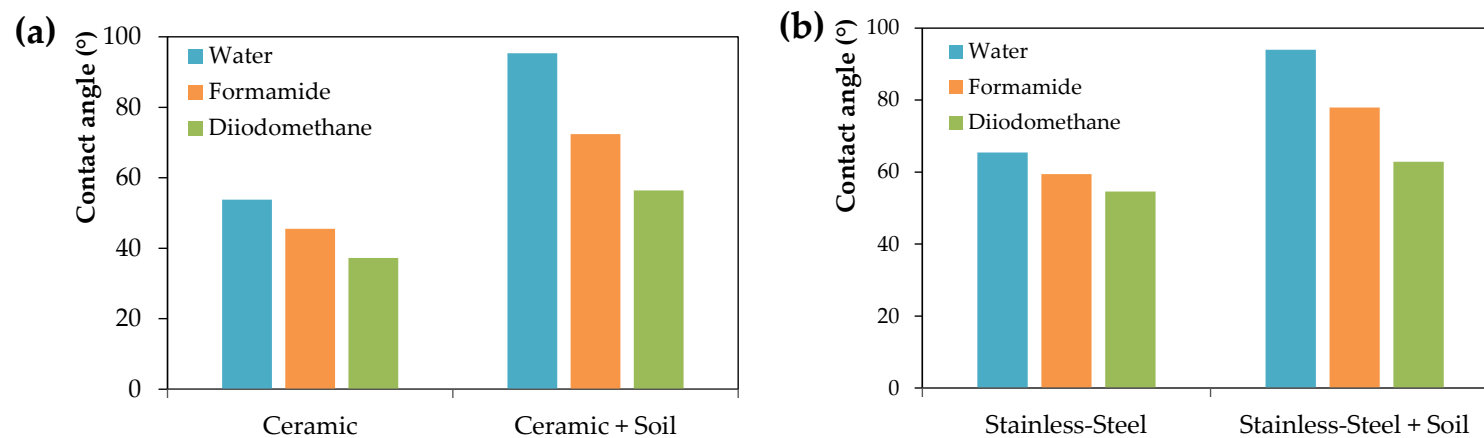

**Figure S1.** Contact angles of net and soiled surfaces: (a) ceramic and (b) stainless-steel.

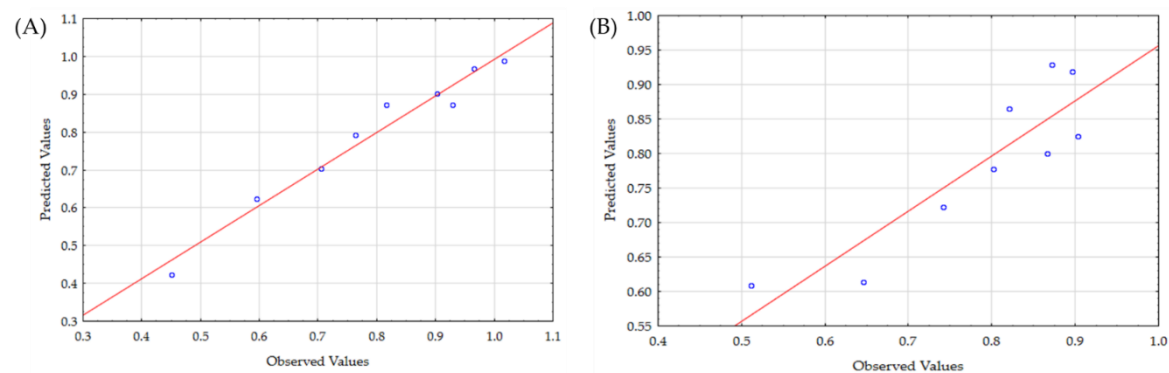

**Figure S2.** Predict *vs.* observed values of IPG + C<sub>11</sub>-C<sub>13</sub> 9EO's for soil's removal from (A) ceramic and (B) stainless-steel.

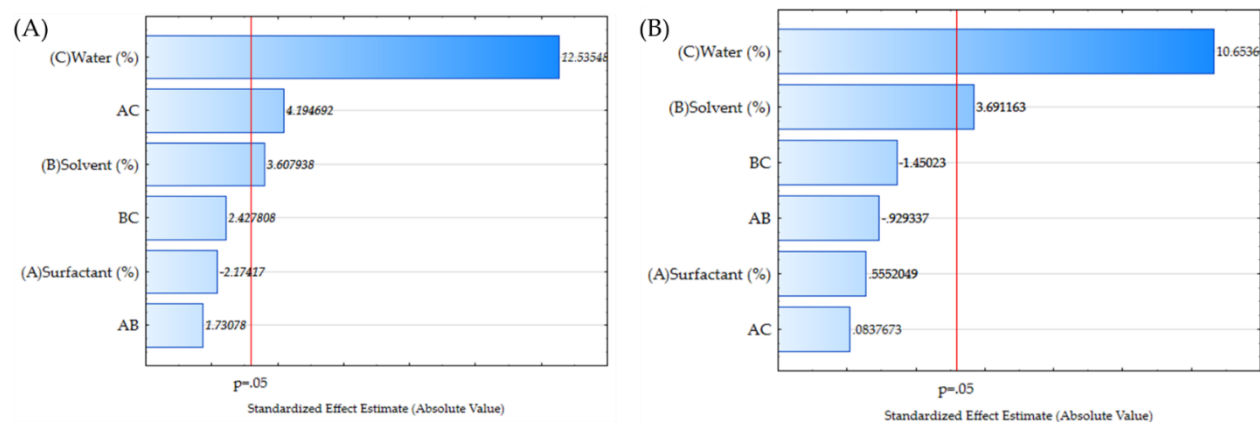

**Figure S3.** Pareto charts for the standardized main effects in the IPG + C<sub>11</sub>-C<sub>13</sub> 9EO's mixture design for (A) ceramic and (B) stainless-steel. The vertical line indicates the statistical significance of the effects (95% of confidence).

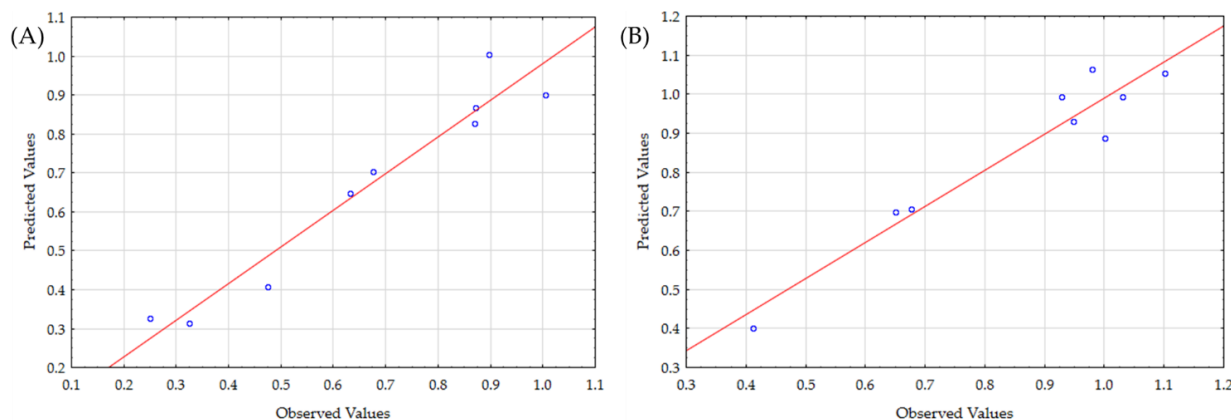

**Figure S4.** Predict *vs.* observed values of BDG + [N<sub>1118</sub>][C<sub>8</sub>O<sub>2</sub>] for soil's removal from (A) ceramic and (B) stainless-steel.

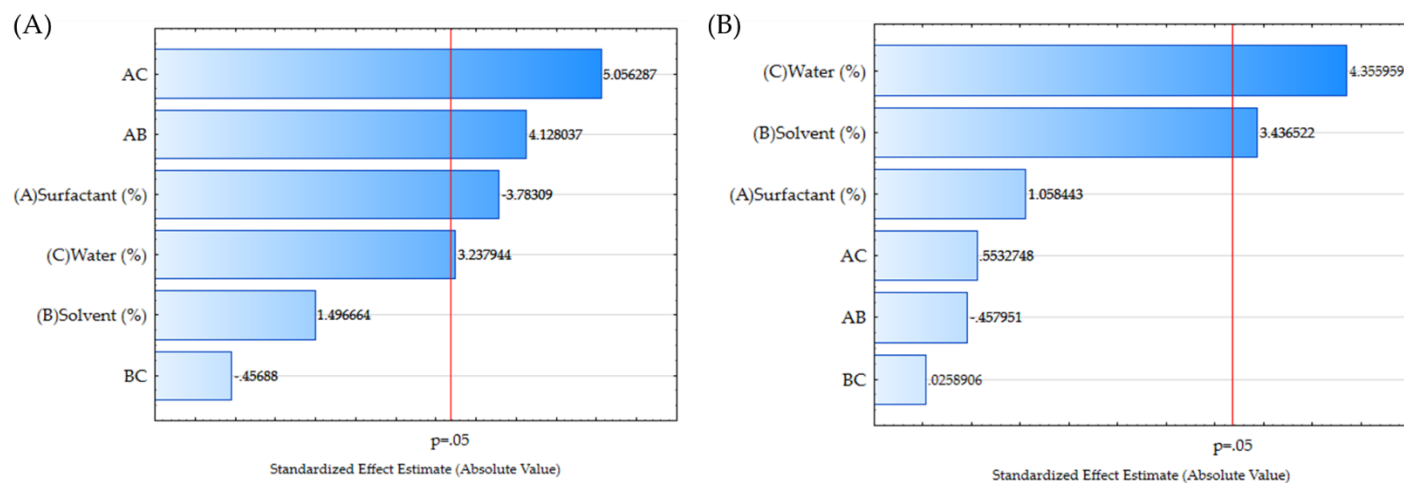

**Figure S5.** Pareto charts for the standardized main effects in the BDG + [N<sub>1118</sub>][C<sub>8</sub>O<sub>2</sub>] mixture design for (A) ceramic and (B) stainless-steel. The vertical line indicates the statistical significance of the effects (95% of confidence).

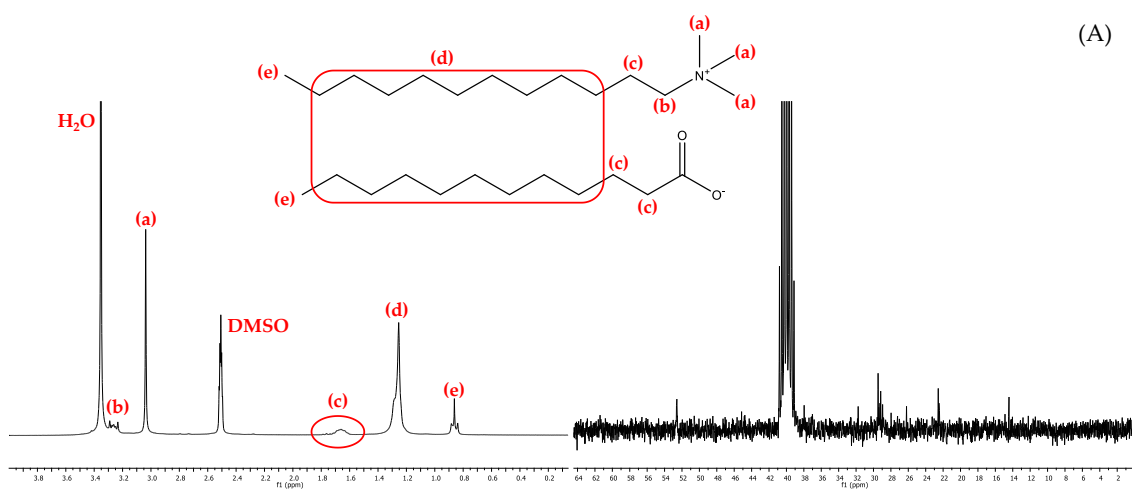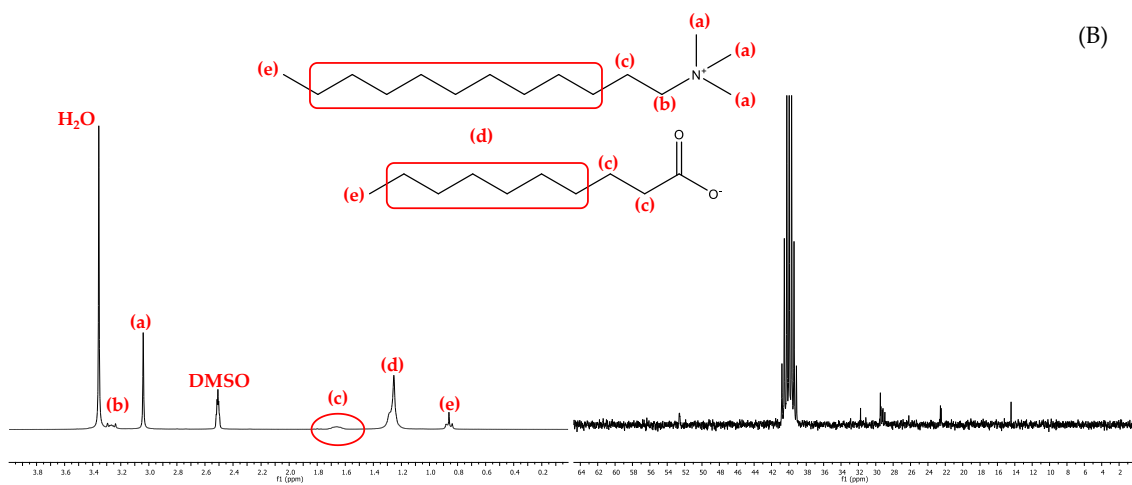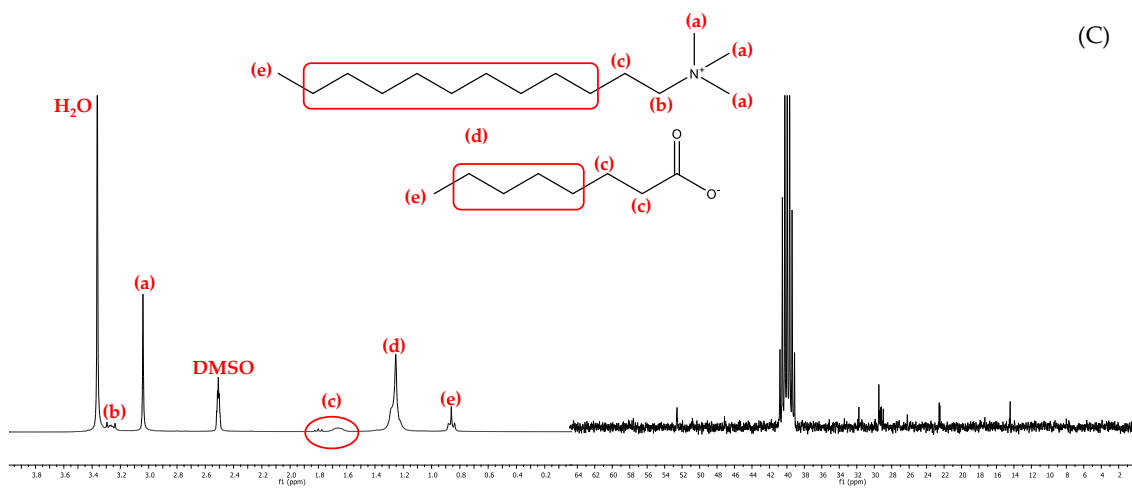

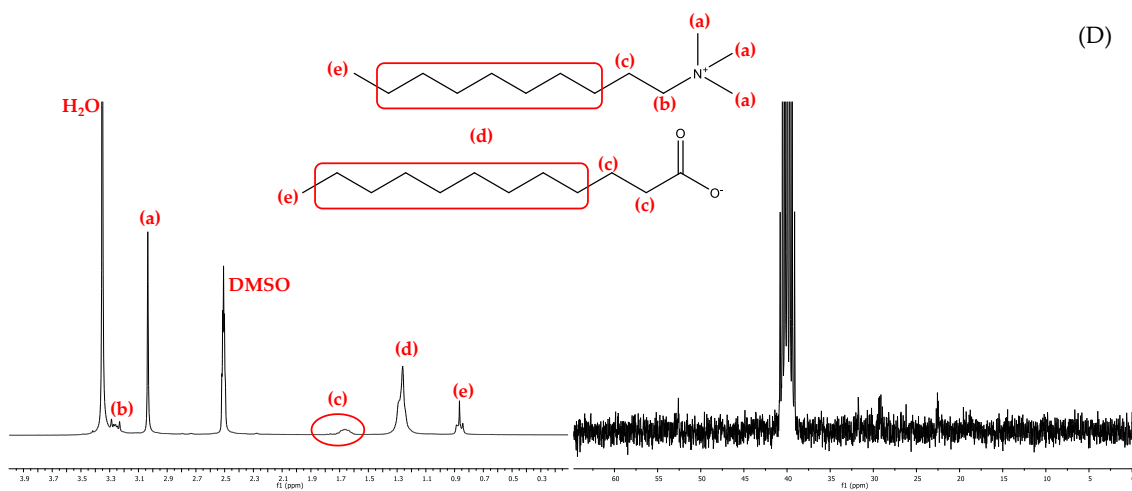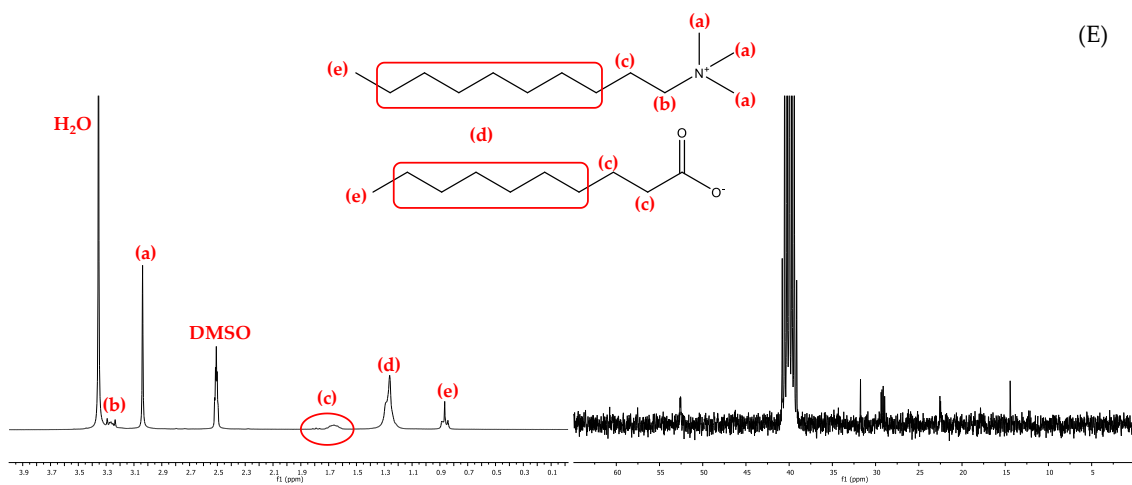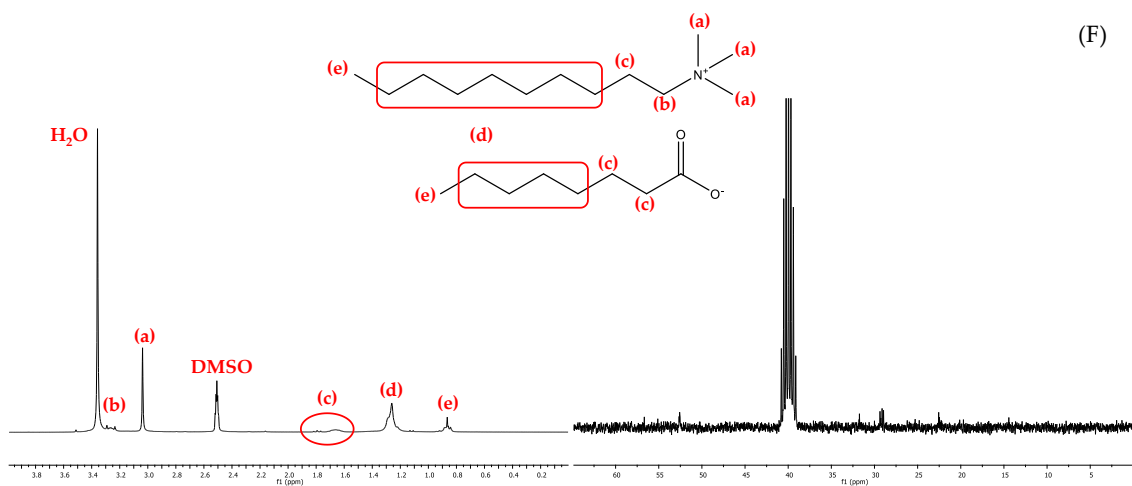

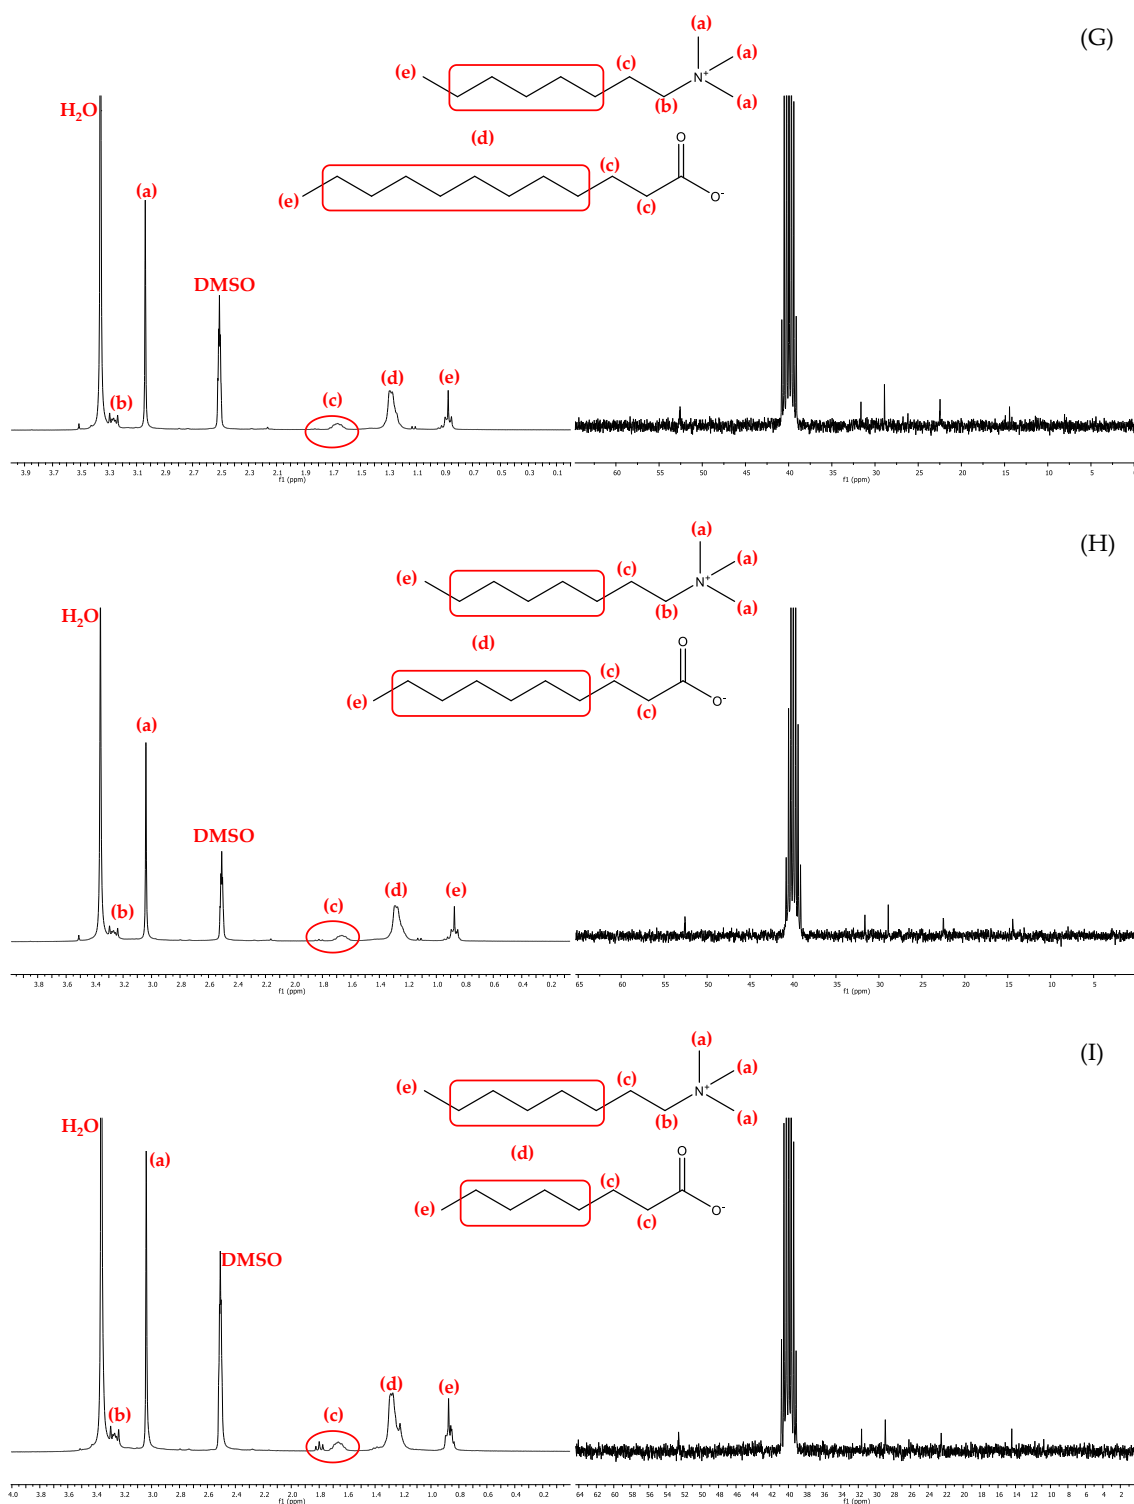

**Figure S6.**  $^1\text{H}$  (left panel) and  $^{13}\text{C}$  (right panel) NMR spectra in DMSO of the ionic surfactants synthesized: (A)  $[\text{N}_{11112}][\text{C}_{12}\text{O}_2]$ ; (B)  $[\text{N}_{11112}][\text{C}_{10}\text{O}_2]$ ; (C)  $[\text{N}_{11112}][\text{C}_8\text{O}_2]$ ; (D)  $[\text{N}_{11110}][\text{C}_{12}\text{O}_2]$ ; (E)  $[\text{N}_{11110}][\text{C}_{10}\text{O}_2]$ ; (F)  $[\text{N}_{11110}][\text{C}_8\text{O}_2]$ ; (G)  $[\text{N}_{1118}][\text{C}_{12}\text{O}_2]$ ; (H)  $[\text{N}_{1118}][\text{C}_{10}\text{O}_2]$ ; (I)  $[\text{N}_{1118}][\text{C}_8\text{O}_2]$ .
